# Supplementary material for: Autoantibodies mediate pain and sensory dysfunction in post-COVID syndrome
Source: Research Square preprint supplement (doi:10.21203/rs.3.rs-7989936/v1), 2025-11-25
Supplement: Supplementary file 1 [file f4f26b302e976e8f10ad0897.pdf]

## Supplementary Figure 1. Effects of IgG from PCS and healthy control individuals on mechanical and cold sensitivities: individual experiments

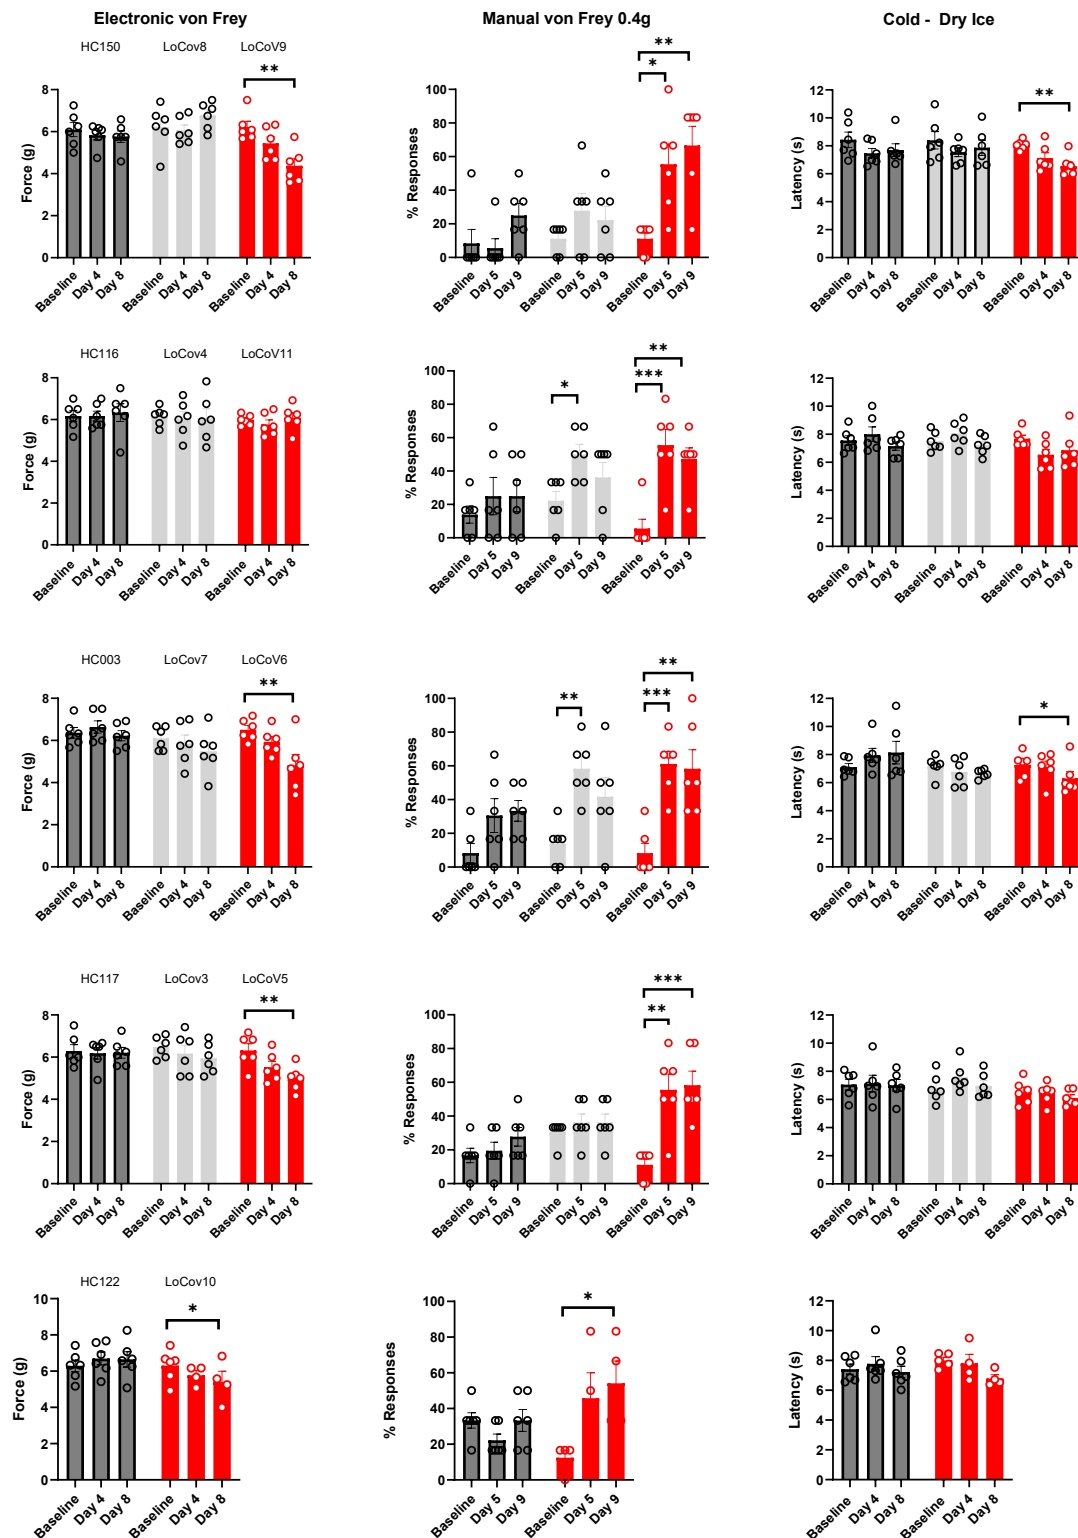

Measurements made before and on days 4/5 and 8/9 after IgG administration. (HC IgG (dark grey), PCS-F IgG (light grey), PCS-PF IgG (red). Results are presented as mean  $\pm$  SEM, and statistical significance was defined as  $p < 0.05$  (\* $p < 0.05$ , \*\* $p < 0.01$ , \*\*\* $p < 0.001$ ).

**Supplementary Table 1. Key features of the Cardiff, UK patient cohort.**

|                    |                   |
|--------------------|-------------------|
| Number of Patients | 208               |
| Female (%)         | 162 (74.3)        |
| Male (%)           | 56 (25.7)         |
| Mean Age (SD)      | 48.3 (11.9)       |
| Age Range          | 20-83             |
| BMI (SD)           | 31.1 (14.8)       |
| BMI >30 n (%)      | 101 (46.3)        |
| Race (%)           |                   |
| Caucasian          | 195 (89.4)        |
| Black              | 2 (0.01)          |
| Mixed              | 2 (0.01)          |
| Asian              | 12 (5.5)          |
| Other              | 7 (3.2)           |
| General Health     |                   |
| Mean EQ-VAS (SD)   | 53.4 (19.5)       |
| Fatigue            |                   |
| FSS >36 n (%)      | 188/214<br>(87.9) |
| Anxiety            |                   |
| VAS >4 n (%)       | 135/209<br>(64.6) |
| Depression         |                   |
| VAS>4 n (%)        | 93/218 (44.5)     |

*Details of patients recruited with at least one symptom ascribed to prior Sars-Cov-2 infection. EQ-VAS (quality of life) scores measured on a scale of 0-100 (worst imaginable health – best imaginable health). FSS fatigue score scale 0-63 (none – worst). Anxiety and Depression VAS scores on a scale of 0-10 (none – worst).*

**Supplementary Table 2. Details of patients studied with microneurography**

| Sex | Age | Symptoms                                 |                                   |                                          |          |                     |                                     |         |                     |                  | Date of infection | Severity* | Microneurography findings |
|-----|-----|------------------------------------------|-----------------------------------|------------------------------------------|----------|---------------------|-------------------------------------|---------|---------------------|------------------|-------------------|-----------|---------------------------|
|     |     | Neurology                                |                                   |                                          |          |                     | Dysautonomia                        | Fatigue | Gastro <sup>3</sup> | Uro <sup>4</sup> |                   |           |                           |
|     |     | Burning pain                             | Deep aching pain/FMS <sup>1</sup> | Paraesthesia                             | Numbness | Headaches/Migraines |                                     |         |                     |                  |                   |           |                           |
| F   | 28  | N                                        | Y<br>(widespread)                 | N                                        | N        | N                   | Y<br>(confirmed PoTS <sup>2</sup> ) | Y       | Y                   | N                | Apr 2020          | Mild      | Normal nociceptors        |
| F   | 48  | N                                        | Y<br>(widespread)                 | N                                        | N        | Y                   | Y                                   | N       | Y                   | Y                | May 2023          | Mild      | Normal nociceptors        |
| F   | 44  | Y<br>(upper & lower limbs & pelvic area) | Y<br>(widespread)                 | Y<br>(upper & lower limbs & pelvic area) | N        | N                   | N                                   | Y       | N                   | Y                | Nov 2021          | Mild      | Spontaneous activity      |
| F   | 37  | Y<br>(upper & lower limbs)               | N                                 | N                                        | N        | Y                   | Y<br>(confirmed PoTS <sup>2</sup> ) | Y       | Y                   | Y                | Mar 2020          | Mild      | Spontaneous activity      |
| F   | 51  | Y<br>(lower limbs)                       | N                                 | N                                        | N        | N                   | Y                                   | Y       | N                   | Y                | Apr 2020          | Mild      | Normal nociceptors        |
| F   | 59  | N                                        | Y<br>(widespread)                 | N                                        | N        | N                   | Y<br>(confirmed PoTS <sup>2</sup> ) | Y       | Y                   | Y                | Nov 2023          | Mild      | Spontaneous activity      |

1. FMS: Fibromyalgia Syndrome; 2. PoTS: Postural Orthostatic Tachycardia Syndrome; 3. Gastro: Gastrointestinal symptoms; 4. Uro: Genitourinary symptoms

\* As defined by World Health Organization. Clinical management of COVID-19: interim guidance, 27 May 2020. Geneva: World Health Organization, 2020. Report No.: Contract No.: WHO/2019-nCoV/clinical/2020

**Supplementary Table 3. Characteristics of PCS patients donating blood samples for passive transfer experiments.**

| Patient       | Age | Sex | SSI Score | WPI Score | Muscle Pain | Joint Pain | Headache | Paresthesias |
|---------------|-----|-----|-----------|-----------|-------------|------------|----------|--------------|
| <b>PCS-PF</b> |     |     |           |           |             |            |          |              |
| LoCoV6        | 34  | F   | 10        | 9         | 4           | 9          | 6        | N            |
| LoCoV10       | 27  | F   | 8         | 8         | 9           | 10         | 9        | N            |
| LoCoV9        | 69  | F   | 8         | 13        | 7           | 8          | 5        | Y            |
| LoCoV11       | 57  | F   | 11        | 10        | 7           | 9          | 5        | Y            |
| LoCoV5        | 50  | F   | 9         | 9         | 7           | 6          | 5        | Y            |

|              |    |   |   |   |   |   |   |   |
|--------------|----|---|---|---|---|---|---|---|
| <b>PCS-F</b> |    |   |   |   |   |   |   |   |
| LoCoV8       | 43 | F | 7 | 0 | 1 | 1 | 1 | N |
| LoCoV3       | 62 | F | 9 | 1 | 1 | 2 | 1 | N |
| LoCoV4       | 35 | F | 9 | 0 | 1 | 1 | 2 | Y |
| LoCoV7       | 26 | M | 9 | 1 | 1 | 1 | 7 | N |

*Characteristics of PCS-PF and PCS-F patients. SSS : Symptom Severity Score (scale 0-12). WPI: Widespread Pain Index (scale 0-19). Diagnosis for fibromyalgia-like symptoms: WPI  $\geq 7$  and SSS  $\geq 5$  or WPI 4-6 and SSS  $\geq 9$ . Regional pain scores on scale 0-10 (none – worst imaginable pain).*

**Supplementary Table 4. Identified autoantibodies in PCS patients donating blood samples for passive transfer experiments.**

| <b>Patient</b> | <b>AGTR2 AAB<br/>U/ml</b> | <b>ADRB-1 AAB<br/>U/ml</b> | <b>ADRB-2 AAB<br/>U/ml</b> | <b>CHRM3 AAB<br/>U/ml</b> | <b>CHRM4 AAB<br/>U/ml</b> |
|----------------|---------------------------|----------------------------|----------------------------|---------------------------|---------------------------|
| <b>PCS-PF</b>  |                           |                            |                            |                           |                           |
| LoCoV6         | 30.171                    | 33.516                     | 10.246                     | 21.948                    | 16.915                    |
| LoCoV10        | >40                       | 73.206                     | 84.236                     | >40                       | 42.145                    |
| LoCoV9         | 13.627                    | 15.857                     | 2.842                      | 12.125                    | 10.304                    |
| LoCoV11        | >40                       | 67.336                     | 55.384                     | >40                       | 52.684                    |
| LoCoV5         | 10.252                    | 13.493                     | 2.149                      | 7.977                     | 9.319                     |

|              |        |        |        |        |        |
|--------------|--------|--------|--------|--------|--------|
| <b>PCS-F</b> |        |        |        |        |        |
| LoCoV8       | 11.681 | 16.076 | 3.593  | 10.534 | 10.137 |
| LoCoV3       | 9.427  | 10.185 | 9.206  | 8.27   | 2.535  |
| LoCoV4       | 21.901 | 19.119 | 6.412  | 12.679 | 15.729 |
| LoCoV7       | 13.281 | 10.653 | 13.488 | 3.368  | 5.076  |

*Measurements of identified autoantibodies directed against Angiotensin 2 receptor, B1 and B2 adrenergic receptors and M3 and M4 muscarinic acetylcholine receptors.*
